# Supplementary material for: Rapid Identification of Black Grain Eumycetoma Causative Agents Using Rolling Circle Amplification
Source: PubMed Central journal article supplement (PMC4256478; doi:10.1371/journal.pntd.0003368), 2014-12-04

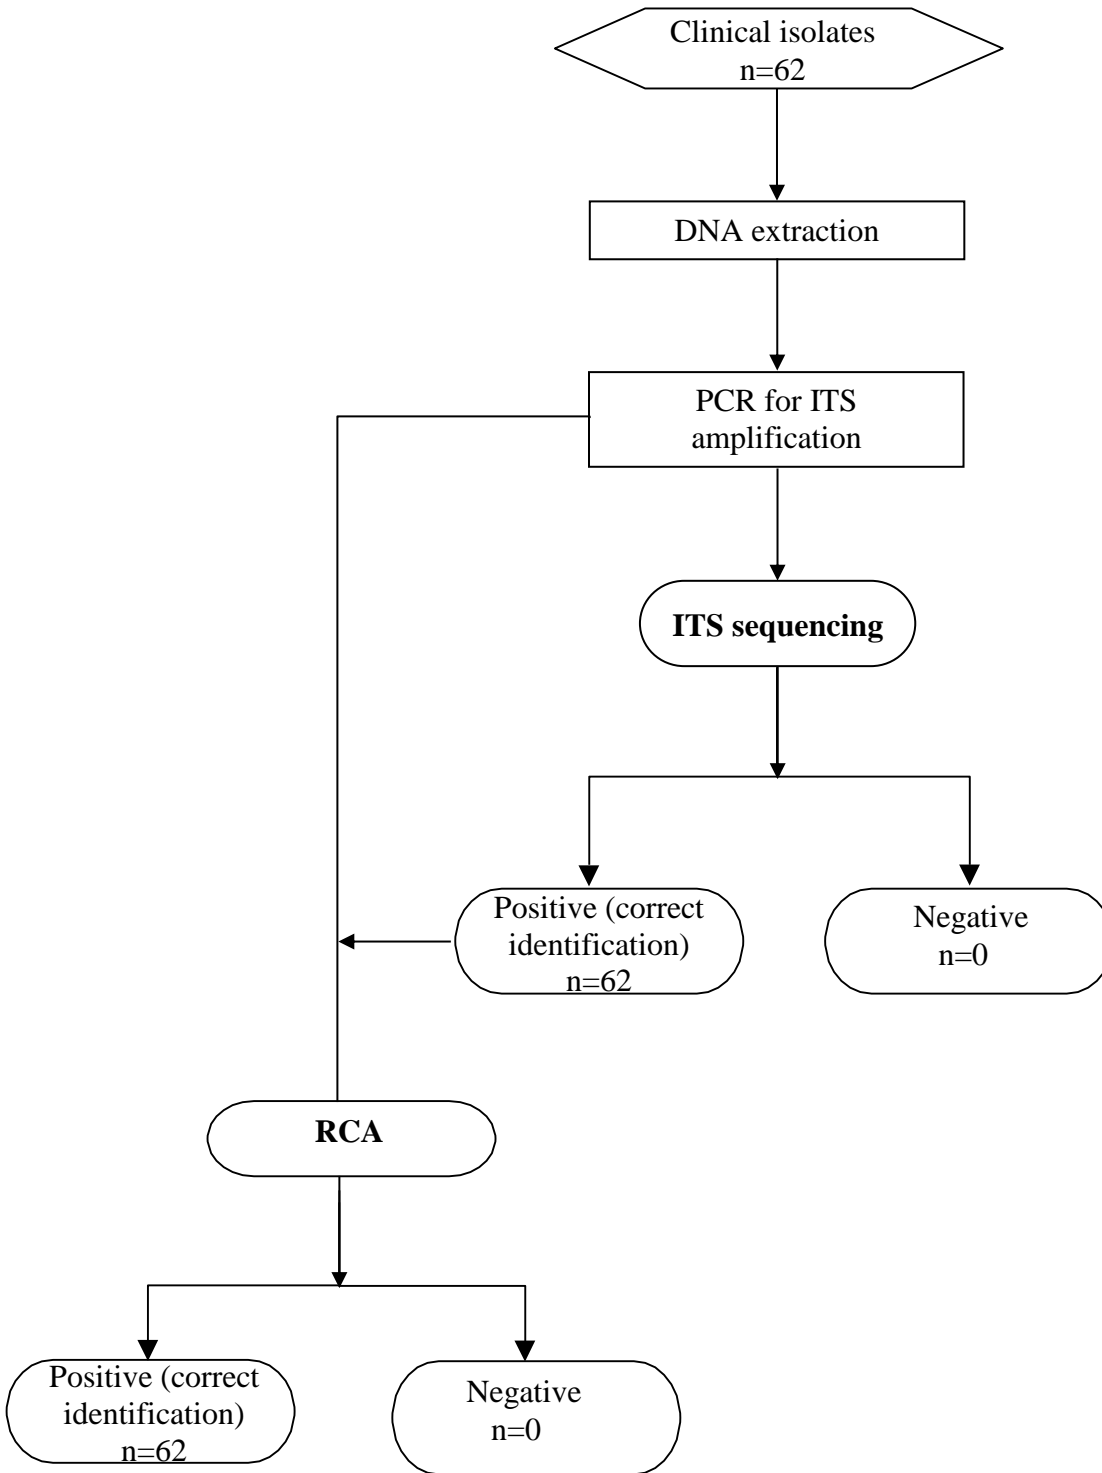

Supplement: pntd.0003368.s001.pdf [file pntd.0003368.s001.pdf]
